# Supplementary material for: Sequence context affects the rate of short insertions and deletions in flies and primates
Source: PubMed Central journal article supplement (PMC2374710; doi:10.1186/gb-2008-9-2-r37), 2008-02-21

Sup Fig 1

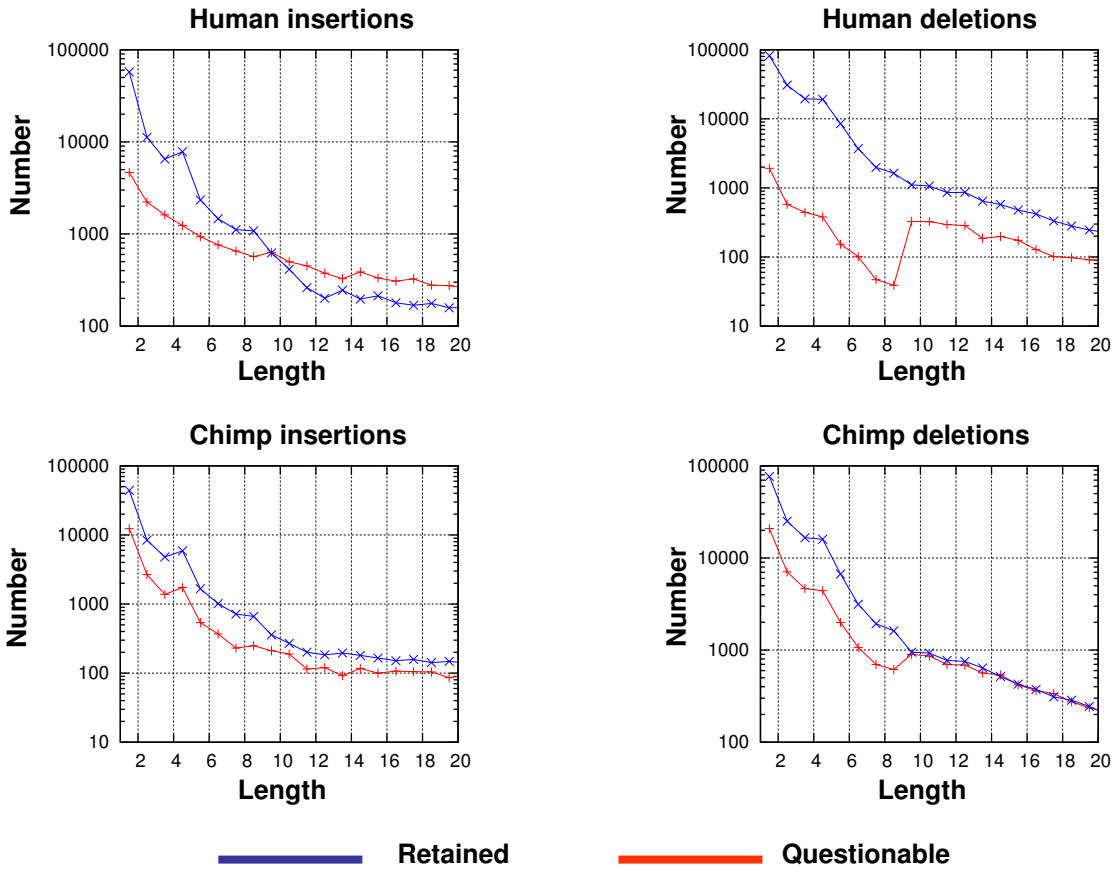

Sup Fig 2

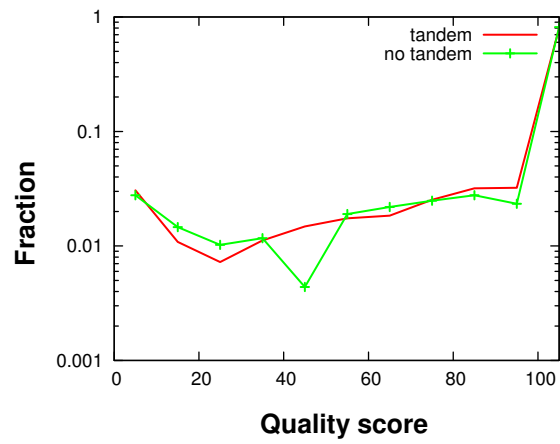

Chimp events

Inserts, l=1

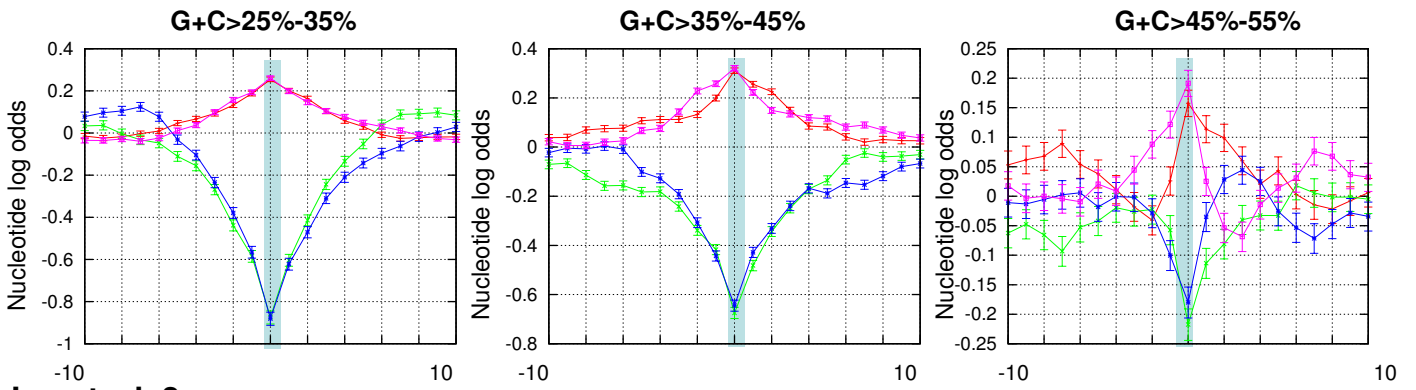

Inserts, l=2

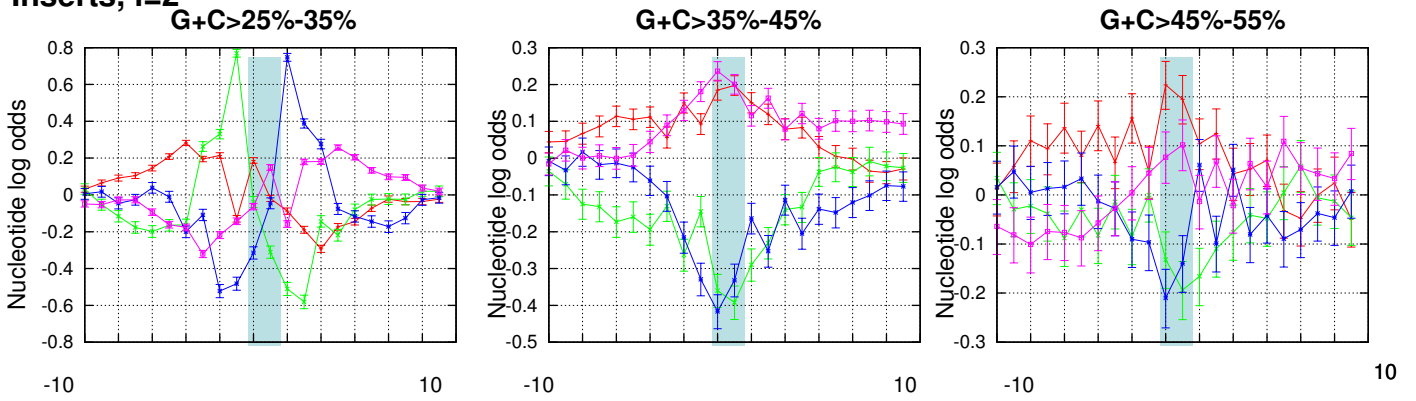

Inserts, l=3

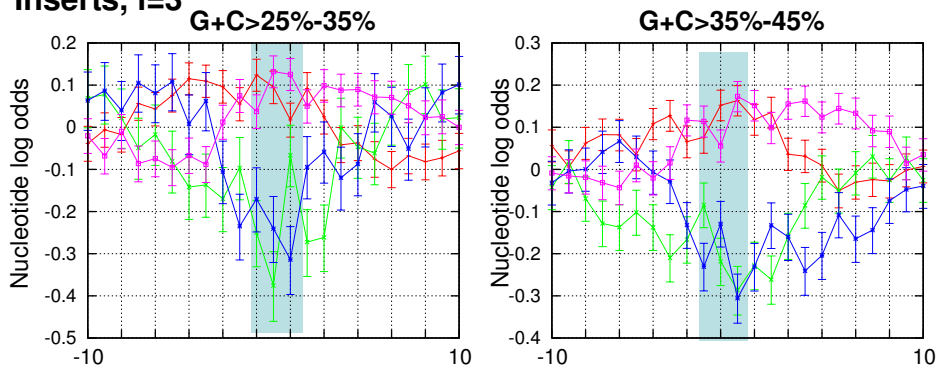

Inserts, l=4

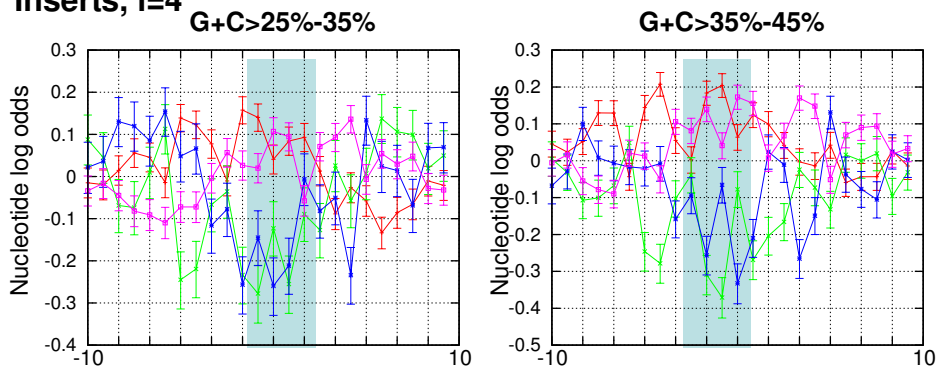

### Deletions, $l=1$

### Chimp events

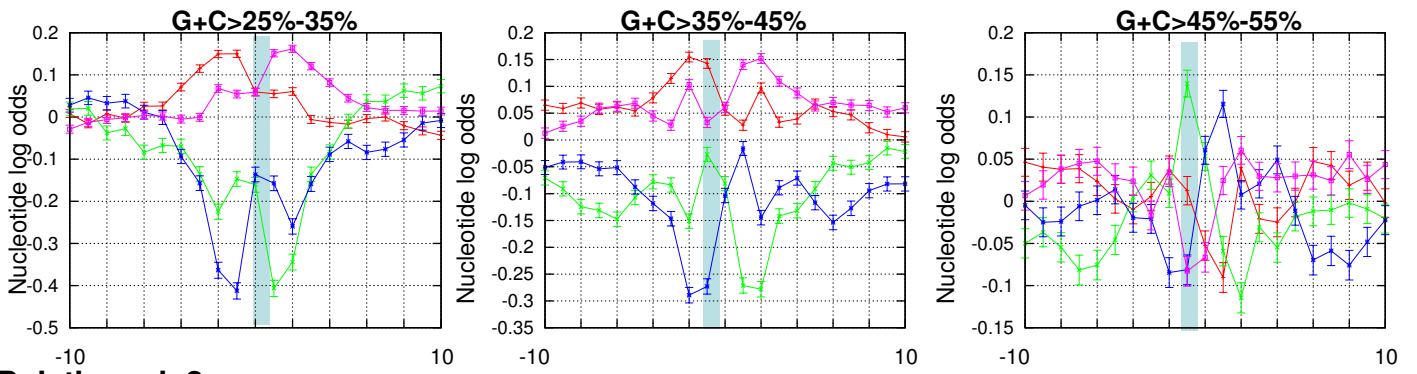

### Deletions, $l=2$

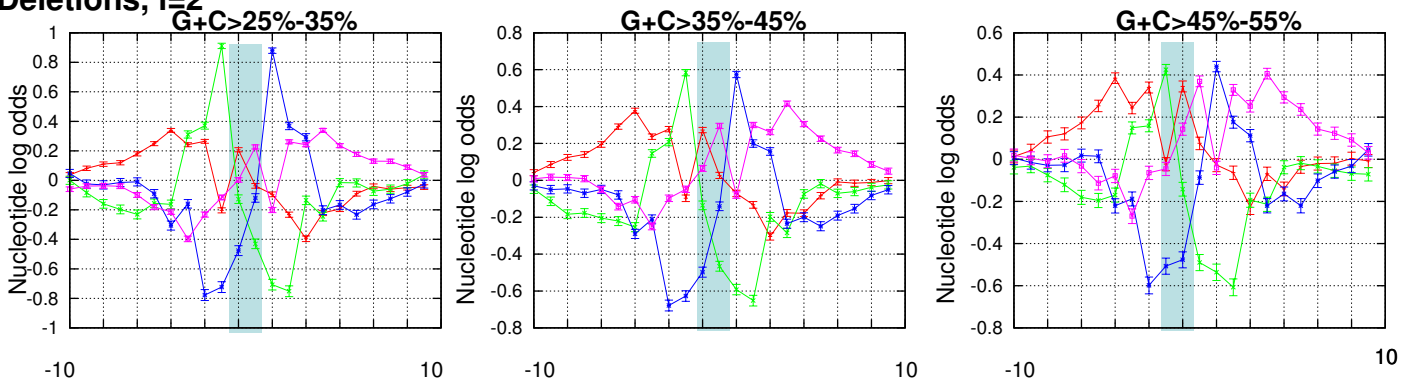

### Deletions, $l=3$

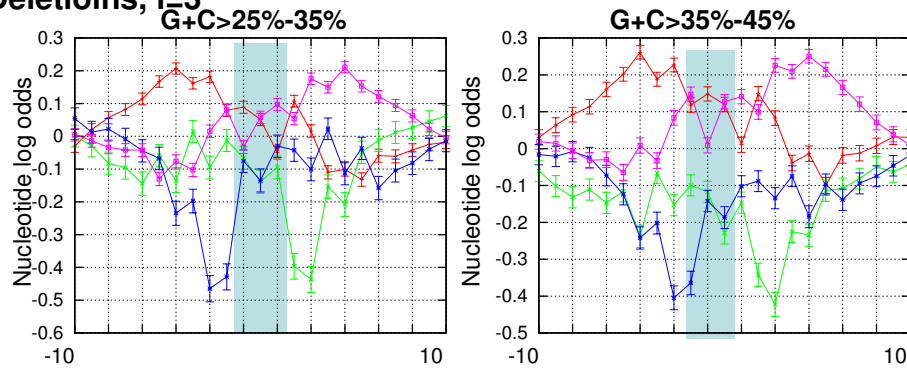

### Deletions, $l=4$

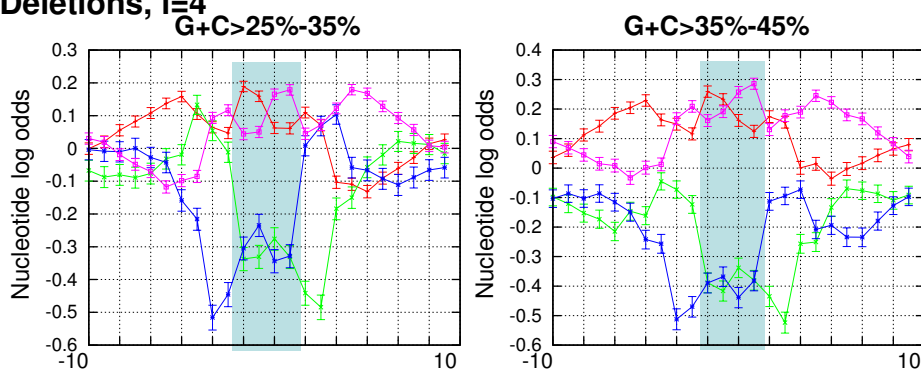

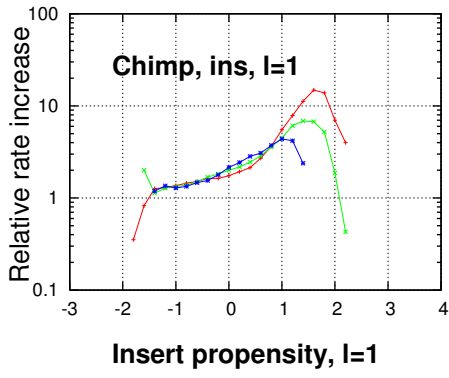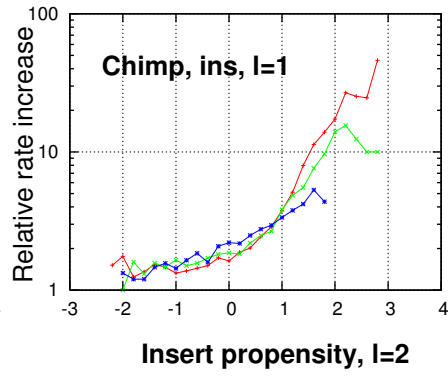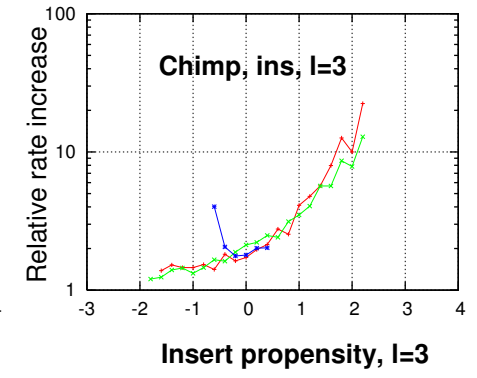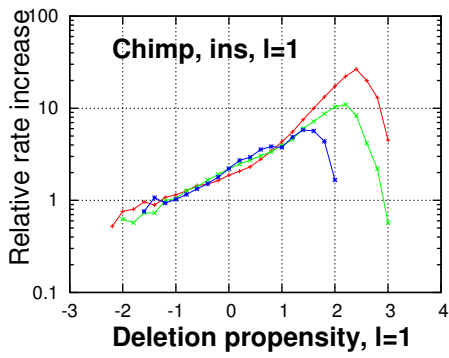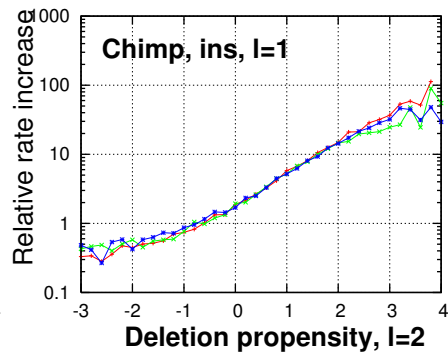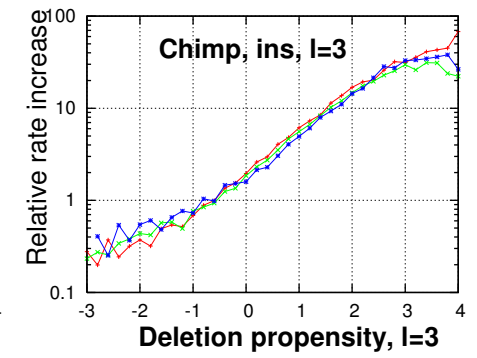

Supplement: gb-2008-9-2-r37-S1.pdf [file gb-2008-9-2-r37-S1.pdf]
